# Supplementary material
Source: PubMed Central journal article supplement (PMC3725092)
Supplement: 1219930110_pnas.201219930SI.pdf [file 1219930110_pnas.201219930SI.pdf]

# Supporting Information

Kang et al. 10.1073/pnas.1219930110

## SI Text

**Host Range of HMO-2011.** The 16S rRNA gene sequence comparison using the EzTaxon database (1) showed that strain IMCC1322 shared more than 90% sequence similarity with the following type strains of six species in the order *Rhodospirillales*: *Nisaea nitritireducens* DR41\_18<sup>T</sup> (92.3%), *Nisaea denitrificans* DR41\_21<sup>T</sup> (91.8%), *Thalassobaculum salexigens* CZ41\_10a<sup>T</sup> (91.2%), *Thalassobaculum litoreum* CL-GR58<sup>T</sup> (90.9%), *Oceanibaculum indicum* P24<sup>T</sup> (90.8%), and *Oceanibaculum pacificum* MC2UP-L3<sup>T</sup> (90.6%). All these strains were obtained from culture collections (Leibniz Institute DSMZ – German Collection of Micro-organisms and Cell Cultures or Korean Collection for Type Cultures) and were used to determine the host range of HMO-2011 by spot plaque assays. Bacterial strains were grown in marine broth 2216 (hereafter referred to as MB; Difco) at 25 °C until the OD<sub>600</sub> reached 0.3–0.5. One milliliter of culture was mixed with 5 mL of molten top agar (MB with 0.5% Bacto agar) and poured onto bottom agar plates (MB with 1.5% Bacto agar). After 20–30 min, 10 μL of phage stock (~3 × 10<sup>7</sup> pfu·ml<sup>-1</sup>) was spotted onto the plates. Plates were incubated at 25 °C for 2–3 d before plaque formation was checked. The spot assay showed that HMO-2011 did not infect any type strains of the six species tested.

## ORFs Predicted to Encode Proteins for DNA Replication and Metabolism.

Four ORFs encoded proteins involved in DNA replication, including a primase (ORF10), helicase (ORF11), DNA polymerase (ORF12), and endonuclease (ORF15). A ribonucleotide reductase (ORF18) and an integrase (ORF9) were also predicted. Although these genes were only distantly related to genes of other isolated phages, the gene content and gene order in this module were similar to those of marine podoviruses such as cyanophages P-SSP7 and Syn5 and, especially roseophage SIO1 (2–4).

The primase and helicase, which are typically encoded as a single protein in many phages such as T7, were separately encoded by ORF10 and ORF11, respectively, in HMO-2011. The replicative DNA helicase encoded by ORF11 had conserved residues in the catalytic domain of DnaB-like helicases, including the Walker A and B motifs (5). However, the DnaG-type primase (ORF10) had unusual spacing between conserved residues in both the zinc-binding domain and the Toprim domain, two conserved domains found in prokaryotic primases (Fig. S24) (6). Similar features were found in primases predicted from several phages and many marine metagenome sequences (Fig. S24) (7).

The phage endonuclease I encoded by ORF15 was similar to gene 3 of phage T7, a Holliday junction resolvase, which resolves Holliday structures and branched DNA molecules produced during phage DNA replication.

ORF9 is predicted to encode a tyrosine integrase that might mediate the site-specific integration of the phage genome into the host chromosome. The deduced amino acid sequence has a catalytic tyrosine and four of five highly conserved residues in tyrosine integrases (8, 9), suggesting the functionality of the protein. Therefore, a search for a putative integration site was performed by comparing the genome sequences of HMO-2011 and IMCC1322 using BLASTN. No match ≥11 bp was found between host genome regions surrounding tRNA genes and phage genome regions near the integrase ORF. However, it is noteworthy that a long (35 bp) match was found between ORF61 of HMO-2011 and SAR116\_2109 of IMCC1322 because the use of tRNA genes as integration sites is not universal (10). Plaques formed by HMO-2011 were always clear, indicating that the probability of lysogeny is very low even if the phage can be temperate.

## ORFs Predicted to Encode Proteins for Structure, Packaging, and Lysis.

Nineteen ORFs were predicted to encode structural proteins. A coat protein containing a P22 coat protein domain (PF11651) was encoded by ORF47, and, in a phylogenetic analysis, it formed a well-supported cluster with coat proteins predicted from the GOS metagenome sequences (Fig. S2B). A portal protein that connects the head and tail and functions as a passage for DNA was encoded by ORF51. Four ORFs (ORF39, ORF42, ORF44, and ORF65) were predicted to encode structural proteins based on similarities to other phage proteins that were identified in virus particles by mass spectrometry (Table S1). ORF31 was annotated as a structural gene because it encoded a C1q domain-containing protein and the C1q domain is known to be involved in interactions with bacterial surface structures (11, 12).

Among the 19 ORFs annotated as structural proteins, 12 were predicted to encode tail proteins. Annotation of tail proteins was mainly based on sequence similarities to tail structural proteins of other phages (Table S1), some of which have been experimentally verified as structural proteins by mass spectrometry. BLAST hits with low sequence similarity or low coverage were used to annotate some tail proteins, considering the mosaicism and divergence of tail fiber genes (3, 13). Paralogous relationships were also used to annotate some tail proteins (Fig. S3) (3). Five ORFs (ORFs 29, 32, 34, 37, and 40) had identical C-terminal ends, and ORF33 and ORF41 shared N-terminal ends (Fig. S3 A and B). In addition, some ORFs were similar to paralogous proteins of other phages or environmental fosmids. For example, ORF39 was similar to ORFs 37–39 of cyanophage P-SSP7 and to *cds53*, *cds55*, and *cds57* of a fosmid from the Mediterranean Sea (Fig. S3C). These paralogues suggested that the tail proteins of HMO-2011 evolved through duplication followed by diversification of proteins or domains, an evolutionary mechanism previously described for the structural proteins of other phages (14, 15).

In tailed phages, packaging of DNA into preassembled capsids requires a portal protein and terminase. In HMO-2011, a portal protein is encoded by ORF51, and terminase, which translocates DNA via ATP hydrolysis, is encoded by ORF52 (large subunit) and ORF55 (small subunit). Lysis of host bacteria is mediated by the concerted action of two proteins, endolysin and holin. A putative endolysin is encoded by ORF56; however, a holin-encoding ORF was not predicted.

## Search for a DnaJ Central Domain in Family A DNA Polymerases.

HMO-2011 ORF12 encodes a DNA polymerase containing a partial DnaJ central domain in addition to a DNA polymerase family A domain. To determine whether other family A DNA polymerases in cultured organisms contain a DnaJ central domain, we performed conserved domain searches for DNA polymerases that were predicted to be similar to ORF12 by BLASTP, PSI-BLAST, or DELTA-BLAST analyses. Among the top 30 hits in each BLAST analysis, no proteins were found to have a DnaJ central domain. Next, the Conserved Domain Architecture Retrieval Tool was used (16), which searches for similar protein sequences based on domain architecture, and can retrieve all proteins sharing at least a single domain. No protein was found to have both a DnaJ central domain and a DNA polymerase family A domain. Finally, the Pfam protein families database was searched using PfamAlyzer, which can retrieve proteins with a combination of domains specified by the user (17). The results yielded no proteins with a DnaJ central domain adjacent to DNA polymerase family A domain.

**Search for Putative DNA Polymerases in Metagenomes Having a Domain Architecture Similar to that of ORF12.** To retrieve metagenome sequences putatively encoding a DNA polymerase similar to ORF12, TBLASTN was performed using ORF12 of HMO-2011 as a query against “All Metagenomic Sanger Reads” and “All Metagenomic 454 Reads” databases in CAMERA (18). The results were downloaded and used to search for ORF12 homologs. In brief, metagenome sequences were regarded as having a domain architecture similar to that of ORF12 if the alignments included an 87-amino acid region of ORF12 (from 294 to 380) and two repeats of the CXXCXGXG motif. One mismatch in each of the repeats was allowed. In other words, metagenome sequences with an N-terminal region of a DNA polymerase domain preceded by a partial DnaJ central domain (Fig. 3) were considered to have a domain architecture similar to that of ORF12. A total of 629 sequences retrieved from 142 metagenome samples satisfied the above criteria (Table S2). Most of the retrieved sequences were from diverse marine habitats encompassing the Pacific, Atlantic, Indian, and Southern Oceans. Among the 629 retrieved sequences, 489 were from pyrosequencing reads.

**ORF61 as an AMG.** Methanesulfonic acid (MSA) is formed in the atmosphere by dimethylsulfide (DMS) oxidation and is deposited onto the surfaces of terrestrial and aquatic environments, where it can be used by microorganisms as sulfur, carbon, and energy sources (19). Considering that 25%–70% of DMS flux is oxidized to MSA (19), utilization of MSA by microorganisms can be important in the biogeochemical sulfur cycle. Methanesulfonate monooxygenase mediates the oxidation of MSA to formaldehyde and sulfite in some methylotrophic bacteria and is composed of hydroxylase, ferredoxin, and reductase components (20, 21). ORF61 of HMO-2011 encodes a hydroxylase alpha-subunit of methanesulfonate monooxygenase (MsmA). To determine whether ORF61 can be considered an auxiliary metabolic gene (AMG), we checked whether IMCC1322 is equipped with gene sets for the import and utilization of MSA. Because it is known that IMCC1322 can use formaldehyde, the oxidized product of MSA (22), we searched for MSA uptake and oxidation genes. A BLASTP search using ORF61 as a query returned two hits from IMCC1322: SAR116\_2102 and SAR116\_2109. Examination of the regions surrounding these two genes showed many genes involved in MSA utilization. Five genes (SAR116\_2097–2101) encoded the ABC-type nitrate/sulfonate/bicarbonate transport system for MSA uptake. Six genes (SAR116\_2102–2107) encoded components of methanesulfonate monooxygenase: hydroxylase alpha- and beta-subunit; ferredoxin; and reductase subunits A, B, and C. Another hydroxylase alpha-subunit was encoded by SAR116\_2109. These results show that IMCC1322 can take up and oxidize MSA, which suggests that the MsmA protein encoded by ORF61 could have an effect on host metabolism during infection. Therefore, ORF61 can be regarded as an AMG. Both the MsmA proteins encoded by IMCC1322 are unusual in their sequences. SAR116\_2102 is much longer than most other MsmA proteins and has a pyridine nucleotide-disulfide oxidoreductase domain in its C terminus. SAR116\_2109 lacked the four cysteine and histidine residues in the Rieske domain. Interestingly, a recent metatranscriptomic study performed for coastal waters in the southeastern region of the United States suggested that the relatively active transcription of a few genes involved in MSA utilization, including SAR116\_2101 and SAR116\_2109, may be a distinctive characteristic of IMCC1322 and close relatives in coastal regions (23). HIMB100, another cultured isolate of the SAR116 clade, does not have genes for MSA uptake and utilization.

**Search for Sequences Similar to the HMO-2011 Genome in the nr, env\_nr, GOS, and BroadPhage Databases.** First, we compared the HMO-2011 genome to the nonredundant (nr) and environmental nonredundant (env\_nr) databases by using BLASTP. Each ORF of

HMO-2011 was used as a query against the nr database (merged database of nr and env\_nr) provided in the Bioinformatics Toolkit (<http://toolkit.tuebingen.mpg.de>) to search for similar protein sequences ( $E$ -value  $\leq 0.01$ ). When normalized by the length of each ORF and database sizes of nr or env\_nr, the search results showed that all HMO-2011 ORFs had more hits in env\_nr than in nr, except 6 ORFs that had no hits in either database. Twenty-nine ORFs had hits in only env\_nr and 67 ORFs had their best hit in env\_nr (Fig. S4A). Nearly all hits in env\_nr were from the global ocean sampling (GOS) database. Second, a comparison between the GOS database (CAM\_PROJ\_GOS) and the BroadPhage database (CAM\_PROJ\_BroadPhage) was performed using TBLASTN at the Community Cyberinfrastructure for Advanced Microbial Ecology Research and Analysis (CAMERA) portal (<https://portal.camera.calit2.net>) (18). Each ORF of the HMO-2011 genome was used as a query, and all BLAST parameters were default values except for gap open cost (=11) and gap extend cost (=1). All hits satisfying the criteria of alignment length ( $\geq 20$  amino acids) and bitscore ( $\geq 40$ ) were counted. Hit counts were normalized by the length of each ORF and database sizes. All 74 ORFs had hits in both databases, and 72 ORFs had more hits in the BroadPhage database (Fig. S4B).

## SI Materials and Methods

**Cultivation of IMCC1322 and Cell Counting.** The host bacterial strain, IMCC1322, was originally isolated from a tiny colony grown on 1/10 marine R2A agar that contained 1.82 g of R2A agar powder (Difco) and 13.5 g of Bacto agar (Difco) per 1 L of diluted aged seawater [distilled water:aged seawater, 2:8 (vol/vol)]. However, growth of IMCC1322 on 1/10 marine R2A agar was very slow and often inefficient. When a colony grown on agar plates was transferred to a new plate by streaking, only 5–10 colonies were visible to the naked eye after 2–3 wk of incubation at 20 °C. Furthermore, it was difficult to establish a stable broth culture from these colonies. Therefore, a large number of glycerol stocks were prepared every time a stable broth culture was obtained, and these were used as inoculum for broth media. For the experiments performed in this study, IMCC1322 was grown and maintained in a seawater-based liquid medium (mPYC; 0.5 g proteose peptone, 0.5 g yeast extract, and 0.5 g casamino acids per 1 L seawater) at 15 °C with shaking at 100 rpm. mPYC medium was prepared by adding a presterilized nutrient stock solution at a ratio of 1:50 to aged seawater that had been filtered through a 0.2- $\mu$ m filter and had been autoclaved. The nutrient stock solution contained proteose peptone no. 3, yeast extract, and casamino acids (25 g·L<sup>-1</sup> each, all from Difco) and was sterilized by autoclaving (121 °C, 20 min). Broth cultures were usually grown in 30–50 mL of mPYC medium using 125-mL baffled Erlenmeyer polycarbonate flasks equipped with vent caps (Corning) and were transferred to new medium in new flasks at a ratio of 1:10–1:20 every 5 d. The concentration of IMCC1322 cells was determined using a Guava EasyCyte flow cytometer (Millipore) after staining with SYBR Green I (Invitrogen) (24).

**Morphological Characterization Using Transmission Electron Microscopy.** Phage particles in culture lysate (100 mL) were pelleted by ultracentrifugation (120,000  $\times g$ , 1 h) after filter sterilization (0.2  $\mu$ m). After the supernatants were discarded, the pellets were re-suspended in 50  $\mu$ L of SM buffer without gelatin (50 mM Tris-Cl, 0.1 M NaCl, 8 mM MgSO<sub>4</sub>, pH 7.5). Concentrated phage (5  $\mu$ L) was adsorbed onto carbon and formvar-coated 200-mesh copper grids (EMS) and stained with a 2% solution of uranyl acetate (Sigma). Grid examination was performed using a transmission electron microscope (CM200; Philips).

**Plaque Assay.** Plaque assays for the purification and titration of phage samples were performed using the double agar overlay method. The recipe for the bottom and top agars was the same as that for mPYC except that Noble agar (Difco) was added to filtered

seawater before autoclaving at a final concentration of 1.5% (bottom) and 0.5% (top). For the plaque assay, phage samples (100  $\mu$ L) were added to 500  $\mu$ L of IMCC1322 culture, mixed briefly by vortexing, and incubated for 30–60 min at 20 °C. After incubation, 5 mL of top agar, maintained at 42 °C, was added to the mixed samples. After mixing by swirling, the mixtures were immediately poured onto the bottom agar plates and allowed to solidify. Plaques were counted after incubation at 20 °C for 1 wk. Phage samples were diluted with autoclaved seawater as necessary.

**One-Step Growth Curve.** Exponentially growing IMCC1322 cells ( $\sim 2 \times 10^8$  cells in 0.4 mL) were mixed with HMO-2011 stock ( $\sim 2 \times 10^7$  pfus in 0.1 mL) and incubated for 1 h at 20 °C. After incubation, the mixture was centrifuged (12,000  $\times g$ , 5 min) and the supernatant was discarded. The pellet was resuspended by vortexing after adding 0.5 mL of mPYC. Subsequently, 0.1 mL of this suspension was added to three flasks containing 30 mL of mPYC. The flasks were incubated at 20 °C (at 100 rpm) for 24 h. Culture broths were withdrawn every 2 h and used for the plaque assay as described above. Plaques were counted after incubation at 20 °C for 1 wk.

**Coculture of IMCC1322 and HMO-2011.** Fifteen milliliters of exponentially growing IMCC1322 culture was inoculated into 300 mL of mPYC in a 1-L Erlenmeyer flask and mixed by swirling. This mixture was dispensed into six 125-mL Erlenmeyer flasks (50 mL per flask). Phage stock solution was added to three flasks at a multiplicity of infection (MOI) of  $\sim 0.001$  and mixed by swirling. The remaining three flasks were used as controls. Cultures were incubated at 15 °C with shaking at 100 rpm for 6 d. During incubation, 2 mL of culture broth was withdrawn from each flask every day and was used for the following experiments. One milliliter from all six flasks was fixed with 0.2- $\mu$ m filtered formalin (final concentration, 2%) and stored at 4 °C until it was used for the determination of IMCC1322 cell numbers by flow cytometry as described above. Chloroform was added (10%, vol/vol) to 1 mL of culture broth withdrawn from the three flasks inoculated with phage stock solution and mixed by vortexing for 1 min. After centrifugation (5 min, 12,000  $\times g$ ), the aqueous phase was recovered and stored at 4 °C until it was used for the determination of phage titers by plaque assays.

**Phylogenetic Analysis of DNA Polymerase Sequences.** Three Pfam alignment files [Full, National Center for Biotechnology Information (NCBI), and Metagenomics] of PF00476 (DNA polymerase family A) were downloaded and used to extract the sequence regions corresponding to the DNA polymerase family A domain from 56 DNA polymerases. These extracted regions were used as a search database for BLASTP analysis of HMO2011 ORF12 and 2 family A DNA polymerase sequences of pelagiphages, HTVC011P (AGE60547.1) and HTVC019P (AGE60596.1). Based on the BLASTP results, sequence regions corresponding to the DNA polymerase family A domain were extracted from the DNA polymerases of HMO-2011 (331–680 aa), HTVC011P (201–589 aa), and HTVC019P (201–565 aa). These three sequences were combined with the above 56 sequences and aligned using MUSCLE for tree building (25). An unrooted maximum-likelihood tree was constructed using RAxML version 7.2.8 with a bootstrap of 100 replicates (26). The command line was as follows: `raxmlHPC-PTHREADS -f a -s DNAPol.phy -n DNAPol -m PROTGAM-MAWAGF -x 0123 -# 100 -T 4`.

**Viromes Used for Binning Analysis: Selection Process, Brief Descriptions, and Sequence Processing.** Seven viromes from the Indian and Pacific Ocean were selected for binning analyses. Four viromes from the Indian Ocean were included in our analyses without preliminary selection procedures because these were the only viral metagenomes obtained from the Indian Ocean (27). The three Pacific Ocean viromes were selected among the marine viromes de-

posited in the CAMERA Web site, mainly based on the proportion of reads recruited by the HMO-2011 genome (18). The CAMERA database was chosen as a starting point for the selection of viromes because it contains the BroadPhage database in addition to legacy viral metagenome data (28, 29). First, BLASTN analyses were performed using the HMO-2011 genome as a query. The search databases were “All Metagenomic 454 Reads” (All454) and “All Metagenomic Sanger Reads” (AllSanger). All BLAST parameters were the default values except for match reward (=2), mismatch penalty (=−3), gap open cost (=5), gap extend cost (=2), and low complexity filter (=F). Only the hits satisfying the criteria of alignment length ( $\geq 50$ ) and bitscore ( $\geq 40$ ) were counted. From the search results, the proportion of sequences similar to the HMO-2011 genome was calculated for each metagenome. Because CAMERA restricted the number of hits per query to 50,000, the results from All454 were insufficient for retrieving all sequences satisfying the criteria described above. Therefore, the top 20 metagenomes were selected based on the proportions calculated from 50,000 hits, excluding datasets from microbial fractions ( $>0.1 \mu$ m), animals, PCR products, mesocosm experiments, or ssDNA. These 20 metagenomes were reanalyzed separately using the same method as described above. When combined with the result from AllSanger, 11 viromes had a higher proportion ( $>1\%$  of total reads) of reads similar to the HMO-2011 genome. These 11 viromes were as follows: CAM\_SMPL\_MOVE0902, JCVI\_SMPL\_1103283000058 (MOVE858), CAM\_SMPL\_000816, CAM\_SMPL\_000801, CAM\_SMPL\_001011, CAM\_SMPL\_000990, CAM\_SMPL\_000722, CAM\_SMPL\_000723, CAM\_SMPL\_000725, CAM\_SMPL\_000724, and CAM\_SMPL\_000727. Two viromes, CAM\_SMPL\_MOVE0902 and JCVI\_SMPL\_1103283000058 (MOVE858), were excluded from further analyses because they contained a relatively small number of sequences (5,641 and 11,496 sequences, respectively). In addition, 5 viromes from Scripps Pier (CAM\_SMPL\_000722, CAM\_SMPL\_000723, CAM\_SMPL\_000725, CAM\_SMPL\_000724, and CAM\_SMPL\_000727) were replaced by a single virome (CAM\_S\_1336) that was indicated to originate from a seawater sample collected from the same station on the same day as the above 5 viromes (30), based on the suggestion made by Dr. Matthew Sullivan (University of Arizona, principal investigator for all 6 viromes from Scripps Pier). Consequently, 5 viromes from the CAMERA database were used for binning analysis: CAM\_SMPL\_000816, CAM\_SMPL\_000801, CAM\_SMPL\_001011, CAM\_SMPL\_000990, and CAM\_S\_1336. However, the results of 2 viromes from station ALOHA (CAM\_SMPL\_000816 and CAM\_SMPL\_000801) are not shown in Table 1 and Fig. 4 because it was known to us, after the binning analyses were finished, that these 2 viromes were obtained using DNA samples extracted from bands of a pulsed-field electrophoresis gel on which a viral community DNA sample was resolved. CAM\_SMPL\_000816 was from a band around 60 kb whereas CAM\_SMPL\_000801 was from a band around 130 kb (Dr. Grieg Steward, University of Hawaii, principal investigator of 2 viromes). For the readers' information, results of BLASTN analyses of 2 viromes are briefly presented below. The HMO-2011 genome was assigned by 3.3% and 2.2% of total reads, contributing 38.6% and 7.9% of the reads assigned to viruses for CAM\_SMPL\_000816 and CAM\_SMPL\_000801, respectively. Reads assigned to HMO-2011 from CAM\_SMPL\_000801 were highly biased toward ORF18 that encodes a ribonucleotide reductase.

Brief descriptions of the seven selected viromes are given below to present information that may be important for interpretation of the binning results. All seven viromes were generated by pyrosequencing. For the four viromes from the Indian Ocean, water samples were filtered through 0.1- $\mu$ m membrane filters and concentrated by tangential flow filtration (TFF). These viral concentrates were treated with nuclease, pelleted by a sucrose cushion, and used for DNA extraction. DNA samples were fragmented and used to construct linker-amplified shotgun

libraries for pyrosequencing (27). A surface seawater sample used for a virome from Scripps Pier (CAM\_S\_1336) was filtered through 0.22- $\mu$ m membrane filters and concentrated using either TFF or FeCl<sub>3</sub> precipitation. Viral concentrates were purified with DNase treatment, and some subsamples were further purified by CsCl-step gradient or sucrose cushion ultracentrifugation. DNA samples were extracted from the purified viral concentrates and used for pyrosequencing after library construction by linker amplification (30). To our knowledge, there are no publicly available references for the remaining two viromes except the metadata provided by the CAMERA database. A virome from the north-eastern subarctic Pacific (CAM\_SMPL\_001011) was obtained from a water sample filtered through 0.2- $\mu$ m membrane filters. Template preparation methods included precipitation by FeCl<sub>3</sub>, DNase treatment, and CsCl-gradient ultracentrifugation. This virome shared the latitude and longitude of the sampling station, the date of sampling, sampling depth, and principal investigator with CAM\_SMPL\_002238 (31). Therefore, it is highly probable that CAM\_SMPL\_001011 was produced using a linker-amplified shotgun library protocol similar to CAM\_SMPL\_002238. A virome from Southern California Bight (CAM\_SMPL\_000990) seems to have been obtained from a mixed sample that was prepared using at least six water samples collected from the upper mixed euphotic layer on three different sampling dates. Although only CsCl-gradient ultracentrifugation is mentioned as a template

preparation method in the CAMERA database, this virome is believed to have been obtained from water samples processed as follows: filtration with a 0.22- $\mu$ m filter, FeCl<sub>3</sub> flocculation, DNase treatment, CsCl-gradient ultracentrifugation, and linker amplification (communication with Dr. Jed Fuhrman, University of Southern California, principal investigator). See Table S3 for more details about the viromes selected, including the latitude and longitude of sampling stations, temperature and salinity of water samples, and sampling dates.

Sequencing reads in the seven selected viromes were quality trimmed before use for binning analysis. We downloaded the sra files from NCBI for the four Indian Ocean viromes (SRX096024, SRX096023, SRX096025, and SRX096299) and extracted fasta and qual files. Fasta files were downloaded from the CAMERA database for the remaining three viromes. Subsequent sequence processing was performed using Mothur (32). In brief, sequences were trimmed according to the following criteria: minimum length = 100, maximum number of  $N = 1$ , and maximum length of homopolymers = 12. For the Indian Ocean viromes, quality trimming using qual files was also performed as follows: qwindowsize = 50 and qwindowaverage = 25. Putative key, linker, or primer sequences were also trimmed. Finally, artificial replicates were removed using cd-hit-454 (version 4.6.1) with default parameters except for a 0.99 similarity cutoff. The resulting fasta files were used for binning analyses.

1. Chun J, et al. (2007) EzTaxon: A web-based tool for the identification of prokaryotes based on 16S ribosomal RNA gene sequences. *Int J Syst Evol Microbiol* 57(Pt 10): 2259–2261.
2. Rohwer F, et al. (2000) The complete genomic sequence of the marine phage Roseophage SIO1 shares homology with nonmarine phages. *Limnol Oceanogr* 45:408–418.
3. Sullivan MB, Coleman ML, Weigele P, Rohwer F, Chisholm SW (2005) Three *Prochlorococcus* cyanophage genomes: Signature features and ecological interpretations. *PLoS Biol* 3(5): e144.
4. Pope WH, et al. (2007) Genome sequence, structural proteins, and capsid organization of the cyanophage Syn5: A “horned” bacteriophage of marine *synechococcus*. *J Mol Biol* 368(4):966–981.
5. Tuteja N, Tuteja R (2004) Unraveling DNA helicases: Motif, structure, mechanism and function. *Eur J Biochem* 271(10):1849–1863.
6. Frick DN, Richardson CC (2001) DNA primases. *Annu Rev Biochem* 70:39–80.
7. Rusch DB, et al. (2007) The *Sorcerer II* Global Ocean Sampling expedition: Northwest Atlantic through eastern tropical Pacific. *PLoS Biol* 5(3):e77.
8. Nunes-Düby SE, Kwon HJ, Tirumalai RS, Ellenberger T, Landy A (1998) Similarities and differences among 105 members of the Int family of site-specific recombinases. *Nucleic Acids Res* 26(2):391–406.
9. Groth AC, Calos MP (2004) Phage integrases: Biology and applications. *J Mol Biol* 335(3):667–678.
10. Canchaya C, Fournous G, Brüssow H (2004) The impact of prophages on bacterial chromosomes. *Mol Microbiol* 53(1):9–18.
11. Alberti S, et al. (1996) Interaction between complement subcomponent C1q and the *Klebsiella pneumoniae* porin OmpK36. *Infect Immun* 64(11):4719–4725.
12. Roumenina LT, et al. (2008) Interaction of the globular domain of human C1q with *Salmonella typhimurium* lipopolysaccharide. *Biochim Biophys Acta* 1784(9): 1271–1276.
13. Sandmeier H (1994) Acquisition and rearrangement of sequence motifs in the evolution of bacteriophage tail fibres. *Mol Microbiol* 12(3):343–350.
14. Tétart F, Repoilà F, Monod C, Krusch HM (1996) Bacteriophage T4 host range is expanded by duplications of a small domain of the tail fiber adhesin. *J Mol Biol* 258(5):726–731.
15. Lee C-N, et al. (2007) Comparison of genomes of three *Xanthomonas oryzae* bacteriophages. *BMC Genomics* 8:442.
16. Geer LY, Domrachev M, Lipman DJ, Bryant SH (2002) CDART: Protein homology by domain architecture. *Genome Res* 12(10):1619–1623.
17. Hollich V, Sonnhammer ELL (2007) PfamAlyzer: Domain-centric homology search. *Bioinformatics* 23(24):3382–3383.
18. Sun S, et al. (2011) Community cyberinfrastructure for Advanced Microbial Ecology Research and Analysis: the CAMERA resource. *Nucleic Acids Res* 39(Database issue): D546–D551.
19. Kelly DP, Murrell JC (1999) Microbial metabolism of methanesulfonic acid. *Arch Microbiol* 172(6):341–348.
20. Baxter NJ, Scanlan J, De Marco P, Wood AP, Murrell JC (2002) Duplicate copies of genes encoding methanesulfonate monoxygenase in *Marinosulfonomonas methylotropha* strain TR3 and detection of methanesulfonate utilizers in the environment. *Appl Environ Microbiol* 68(1):289–296.
21. Jamshad M, De Marco P, Pacheco CC, Hanczar T, Murrell JC (2006) Identification, mutagenesis, and transcriptional analysis of the methanesulfonate transport operon of *Methylosulfonomonas methylotropha*. *Appl Environ Microbiol* 72(1):276–283.
22. Oh H-M, et al. (2010) Complete genome sequence of “*Candidatus* Puniceispirillum marinum” IMCC1322, a representative of the SAR116 clade in the *Alphaproteobacteria*. *J Bacteriol* 192(12):3240–3241.
23. Gifford SM, Sharma S, Booth M, Moran MA (2013) Expression patterns reveal niche diversification in a marine microbial assemblage. *ISME J* 7(2):281–298.
24. Stingl U, Tripp HJ, Giovannoni SJ (2007) Improvements of high-throughput culturing yielded novel SAR11 strains and other abundant marine bacteria from the Oregon coast and the Bermuda Atlantic Time Series study site. *ISME J* 1(4):361–371.
25. Edgar RC (2004) MUSCLE: multiple sequence alignment with high accuracy and high throughput. *Nucleic Acids Res* 32(5):1792–1797.
26. Stamatakis A (2006) RAXML-VI-HPC: Maximum likelihood-based phylogenetic analyses with thousands of taxa and mixed models. *Bioinformatics* 22(21):2688–2690.
27. Williamson SJ, et al. (2012) Metagenomic exploration of viruses throughout the Indian Ocean. *PLoS ONE* 7(10):e42047.
28. Angly FE, et al. (2006) The marine viromes of four oceanic regions. *PLoS Biol* 4(11): e368.
29. Dinsdale EA, et al. (2008) Functional metagenomic profiling of nine biomes. *Nature* 452(7187):629–632.
30. Hurwitz BL, Deng L, Poulos BT, Sullivan MB (2013) Evaluation of methods to concentrate and purify ocean virus communities through comparative, replicated metagenomics. *Environ Microbiol* 15(5):1428–1440.
31. Hurwitz BL, Sullivan MB (2013) The Pacific Ocean virome (POV): A marine viral metagenomic dataset and associated protein clusters for quantitative viral ecology. *PLoS ONE* 8(2):e57355.
32. Schloss PD, et al. (2009) Introducing mothur: Open-source, platform-independent, community-supported software for describing and comparing microbial communities. *Appl Environ Microbiol* 75(23):7537–7541.



**A**

```

Phage T7 MDNS-----HD--SDSV-----FLYHIPCD-NCGSSD-----GNSLFSGDHTFCYV--C
OP1      MTMAT-----RMTDEEWLPAQASLLL-GGRTRATGCHKECGSSA--GTLGLYREGNELSAYCHR--C
VpV262  MRDSS-----FD--TDILDMTTDLIC-GERSDHLVCP-CORGGDSGERSLLVWCHADGLAYRCYRVK
HMO-2011 MSNI-----YNI VSELDIRNGETKRINCP-SCNGHK----TFTVTNNMGKLIWNCYKVC
EBK70876 MMLSN-----IYTLQNI MN IENIDLNI GETKRTNCP-HCGGYN----TFTITNDDGNLVWNCYKLS
EBF32065 MKLN-----INNLESNESKRMDP-E-CGGKN----TFTITNESGKLMWNCYKLS
EDI73997 MPLKFAKKQRKTTVIMKIMVEKLLKTMKIRGYLDSLNLRDDESRRMAP-SCGSKN----TFTATKEMGQIKYNCYKLD

```

```

Phage T7 EKWTAGNEDTKERASKRKPSSGGKPMTYNVWNFGES--NGRYSALTA-RGIS-KETCQKAGYWI AKV-----DGVMYQVAD
OP1      GAYGSQKASESQEEMLRRLTAAE---AQQQ--ITAELPECTSTDPADWPK-EL--SHWCFKHGLHTPRIRELGLYYSKKL
VpV262  GLSGKIGQSGY-RPVSTKMRKPK---CHTR--QLH--PEPLPNDVLDWYLD-Y--FWWADAKMLRV-----NGVLWDETT
HMO-2011 GVSGGTRVHLTVDDIKRGFKDAE---NYAE--EKFELPTYIV--PHRGKRG-V--VKWCAEWGINE---DDHGLMYDVKE
EBK70876 NVRGKKTILSSEDLVALY-NKK---HTDD--CSFDLPDCVV--PGENRQA-V--IEFTNTWGISV-----FDLMYDAKE
EBF32065 KVSGSKKTNMSALDIKNLLNNTK---QTSR--QVYQLPEYVV--PANNHLDKV--KNFTDRWNIPE-----SILYDIKE
EDI73997 SIGGYHNVDMTAAEIKILLSKREAPIKMER---ETMEIPEYVVQ-PSAEHD-KY--HKFVAKWIGD-----SRLLYDVKD

```

```

Phage T7 YRD-----Q-NGN-----IVSQKVRDKD---K-NFK--TTGSHKSDALFGKHLWNGG-----KKIVV
OP1      DRLVLPDYDQGR-----LSYWQARSQTL-KPKWLGPPIDK--RGLIV-QYGKGHG-----SYIVL
VpV262  ERILYPIKSMGTHEGYLARRYDDLVLDKSNFQGGKAKAYNSLPTDYK--MTC--MMTPL--KAQFD-----EWWVV
HMO-2011 DRVVFPPVVDH-GK-----LV DATGRTLTKRIPKWKR--YGN--SGL--PYVSGHG-----KVAVV
EBK70876 HRVVFPIKYG-NE-----IVDAVGKALTRKLPKWKR--YGK--SPL--PYFGSG-----NAAVV
EBF32065 DRAVFP IQSN-GR-----VVDAAGRALTGRLPKWRR--YGN--SNL--PFVYTRKSSDFIPCAVV
EDI73997 ERVVFPIYHK-GR-----IDANGRAVGNKQPKWYR--YTG--AGDY--FFVHADS-----ETLII

```

```

Phage T7 TEGEIDMLTMEL---QDCKYPVVS LGHGASAAKTC AANYEYFDQF--EQIILMFDMDEAGRKAVE-----EAAQ
OP1      TEDAISAYKGLV---CEA---WPLLGT-----KLHPRHA AKLLELG-KPVIWLDNDAAH-SSGSNPQVAAQAI VKQ
VpV262  VEDYPSAMRINTE---IPC---VALSGT-----SIQDATLMELVRAGKRKVCVFLDADATS-KAAS-----MVYN
HMO-2011 VEDCVSATIVGYG--SFVG---VALLGT-----SLSDTHRRYLAQF--STAVIALDPALP-KTLA-----MAKE
EBK70876 VEDCISANVAGNVD-GIVG---VALLGT-----NLLEKHKHLLSKF--STVTVALDPDAML-KSLE-----MKVE
EBF32065 VEDCISAVVVGQL--GFVG---VALLGT-----NVTNEQQKI EQF--NSVI VALDPDAMP-KTIS-----LSRE
EDI73997 VEDCVSALVIKQLLPNANA---MAILGT-----SLTDRHMEKIAEY--NNIIVALDPDAAH-KTLQ-----FSRE

```

```

Phage T7 VLPAGKV-RVAVLPCKDANECHLNHGDRE-IMEQVWVWAGPWI PDGVVSALS L
OP1      LRAYG--LTCYNVVADK-DPKCYDRYQIRKI-----IDEVVN
VpV262  YGLH-FE-HLTFVPLFDADPKDMEDEDFDDLVD-----TIRRLQD V
HMO-2011 LRGH-VS-DVRVLRLLVD-DIKYRNPTDMEKLD-----ALRRQIGE
EBK70876 LRNY-VS-NVRAVKLKD-DLKYKNEDDINII-----REVVVN
EBF32065 LGLF-VS-RVIPFKLTD-DLKYRNEE-----D
EDI73997 IHLW-TGAKTIAFNLDD-DIKYKVDNDIERL-R-----EVT-RCIV

```

**B**

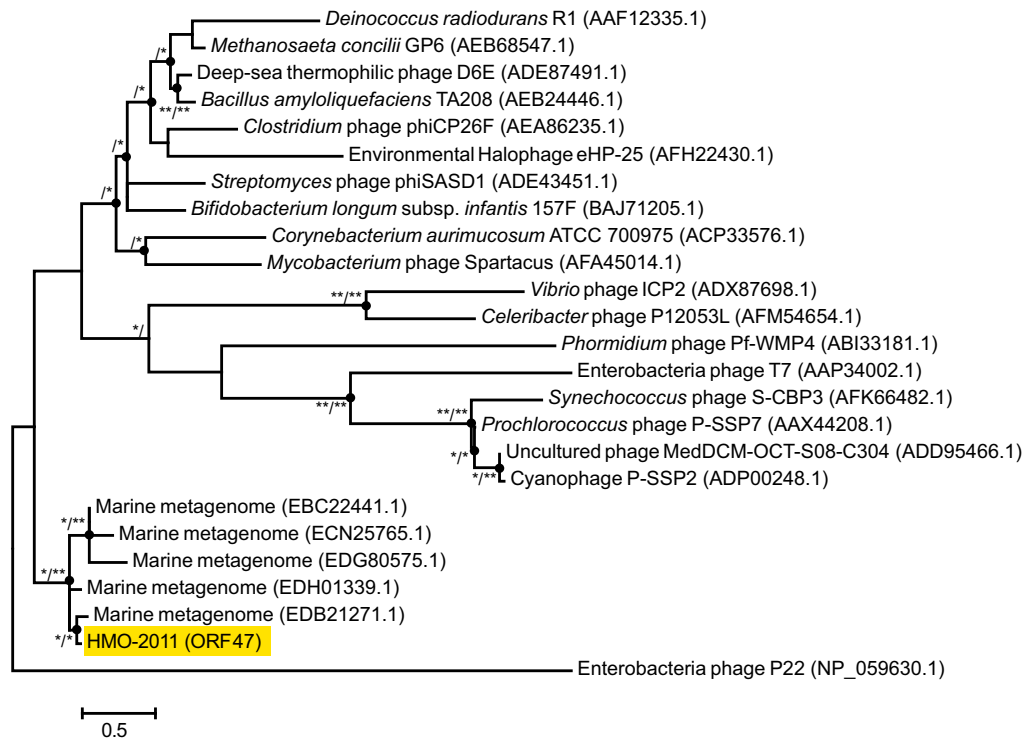

Fig. S2. (Continued)

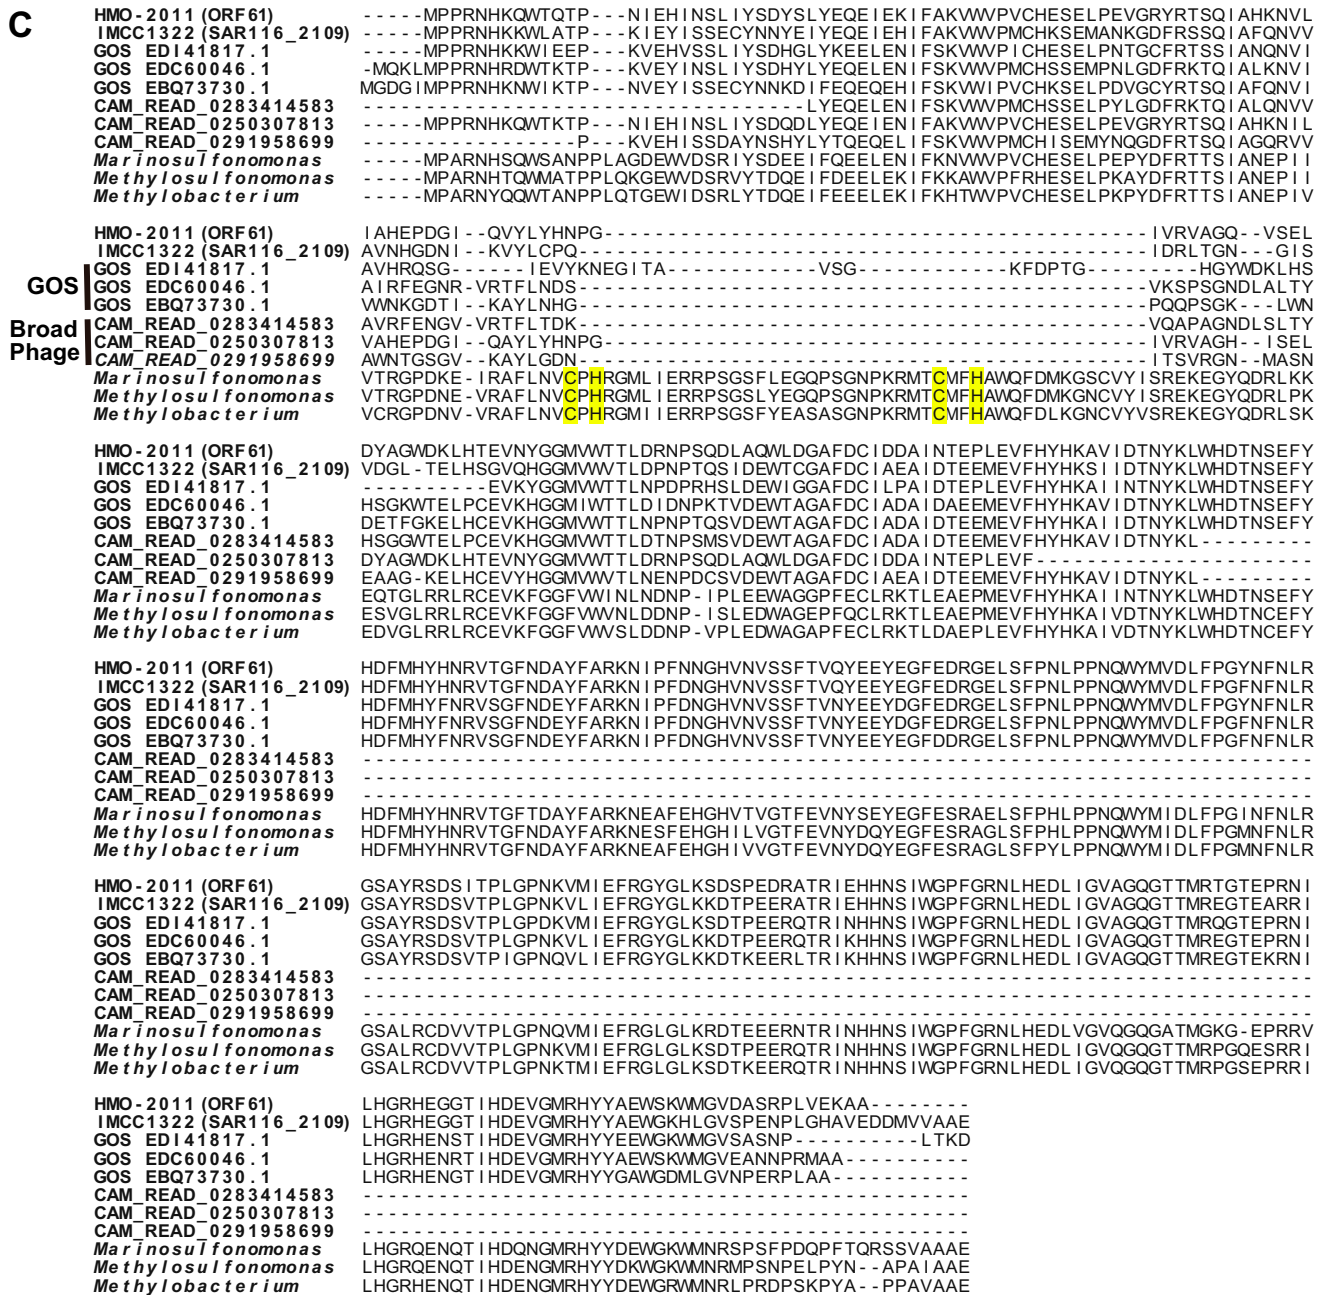

**Fig. S2.** Several representative ORFs that were more closely related to sequences from marine metagenomes than to those from cultured organisms. (A) Alignment of primase sequences. Residues in orange and yellow correspond to putative zinc-binding motifs and Toprim domain catalytic sites (PF08275), respectively. Note that 2 amino acids are inserted in the second CXC motif of the zinc-binding domain and 3 amino acids are deleted in the catalytic motif of the Toprim domain in HMO-2011, VpV262, and the metagenome sequences, compared with phage T7. A deletion in the Toprim domain was also observed in OP1. Accession numbers: Phage T7, NP\_041975.1 (1–271 amino acids); OP1 (*Xanthomonas* phage OP1), YP\_453600.1; VpV262 (*Vibrio* phage VpV262), AAM28363.1. EBK70876, EBF32065, and EDI73997 were retrieved from the GOS metagenome. Alignment was obtained using T-Coffee (1). Alignment of phage T7 was manually adjusted in a short region including zinc-binding motifs, without considering overall alignment quality to more clearly show the position of cysteine or histidine residues. (B) Maximum-likelihood (ML) tree showing relationships among capsid proteins. Alignment using MUSCLE and tree building with ML and neighbor joining (NJ) was performed in MEGA 5.05 (2). The gap option was set to partial deletion (90% cutoff), and the robustness of branches was checked through bootstrap analyses (100 replicates) in both algorithms. Nodes recovered in both trees are indicated by black circles. Bootstrap values are indicated at the nodes with a single ( $\geq 50$ ) or double ( $\geq 90$ ) asterisk (ML/NJ). Note that ORF47 of HMO-2011 formed a robust cluster with marine metagenome sequences. In BLASTP analysis against the nr database of GenBank, ORF47 was shown to be most similar to a hypothetical protein of *Bifidobacterium longum* subsp. *infantis* 157F. Among known viruses, the capsid protein of *Geobacillus* phage D6E (Deep-sea thermophilic phage D6E) was most similar to ORF47. (C) Alignment of putative MsmA proteins. Residues in yellow correspond to cysteine and histidine amino acids conserved in the Rieske domain of MsmA proteins. Sequences marked GOS were retrieved from the env\_nr database of GenBank whereas sequences marked BroadPhage were retrieved from the BroadPhageMetagenomes database at CAMERA. GenBank accession numbers for other sequences: IMCC1322 (SAR116\_2109), ADE40352.1; *Marinosulfonomonas* (*Marinosulfonomonas methylophaga*), AAK84301.1; *Methylosulfonomonas* (*Methylosulfonomonas methylovora*), AAD26619.1; *Methylobacterium* (*Methylobacterium nodulans* ORS 2060), ACL62498.1. Alignment was generated using ClustalW2.

1. Notredame C, Higgins DG, Heringa J (2000) T-Coffee: A novel method for fast and accurate multiple sequence alignment. *J Mol Biol* 302(1):205–217.
2. Tamura K, et al. (2011) MEGA5: molecular evolutionary genetics analysis using maximum likelihood, evolutionary distance, and maximum parsimony methods. *Mol Biol Evol* 28(10): 2731–2739.

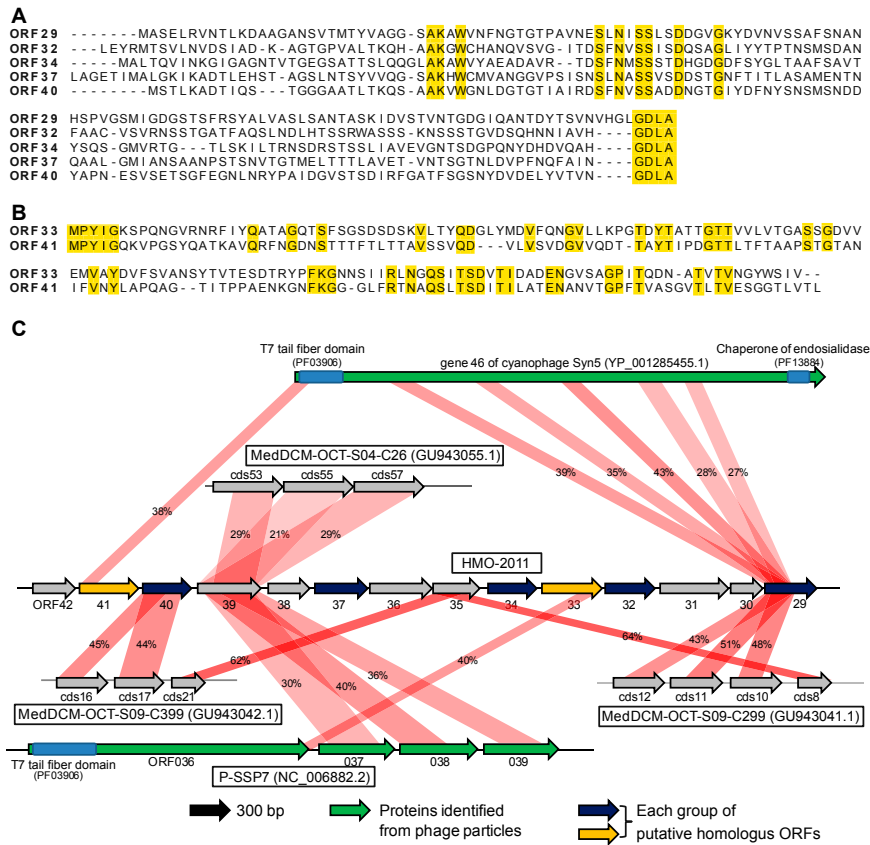

**Fig. S3.** Relationships based on homology among the tail-related proteins of HMO-2011, other marine phages, and marine environmental fosmids. (A) Alignment of the five tail proteins of HMO-2011 sharing C-terminal ends. Conserved residues are in yellow. Alignments were generated using ClustalW2. (B) Alignment of the two tail proteins of HMO-2011 sharing N-terminal ends. Conserved residues are in yellow. Alignments were generated using ClustalW2. (C) Similarities among tail-related proteins of HMO-2011, other phages, and environmental fosmids. ORFs with homology are connected by red shading. Numbers within the shading indicate percent identity at the amino acid level, with the color intensity proportional to identity. The horizontal length of the shading is approximately proportional to alignment length. GenBank or RefSeq accession numbers are provided in parentheses for each protein, genome, or fosmid. ORF lengths are drawn to scale whereas intergenic regions are not. Some homology relationships were omitted for visualization convenience.





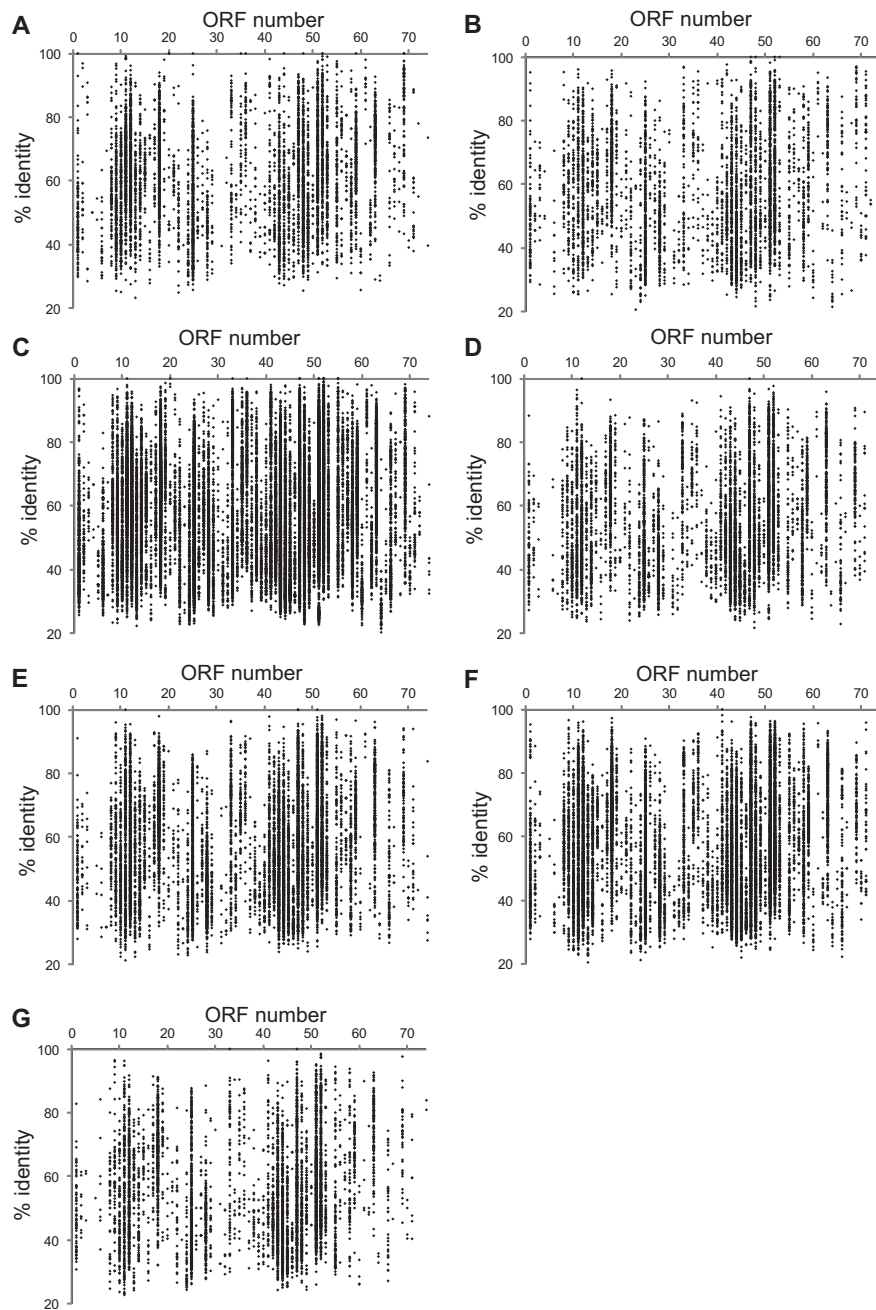

**Fig. S5.** Fragment recruitment plot of marine virome reads assigned to the HMO-2011 genome by BLASTX. Each virome read was plotted according to its matching ORF and sequence identity (%) at the amino acid level. (A) CAM\_SMPL\_001011, (B) CAM\_SMPL\_000990, (C) CAM\_S\_1336, (D) GSIOVIR108, (E) GSIOVIR112, (F) GSIOVIR117, (G) GSIOVIR122. See Table 1 and Table S3 for more information about the samples.

**A**

CAM\_SMPL\_001011

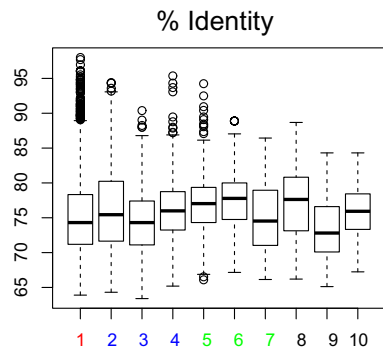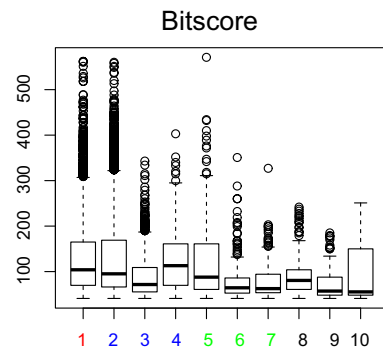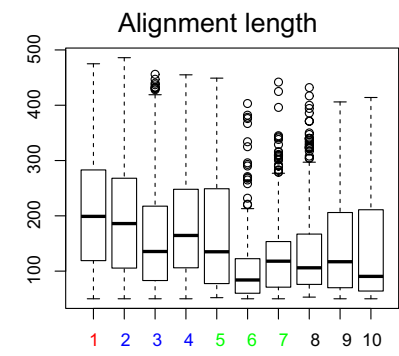

CAM\_SMPL\_00990

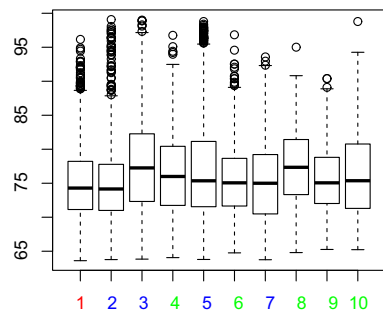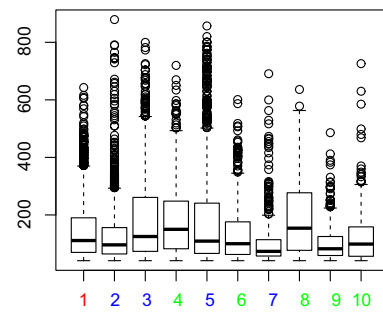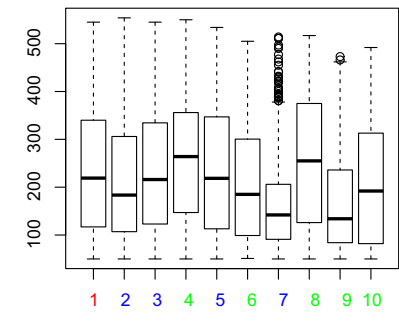

CAM\_S\_1336

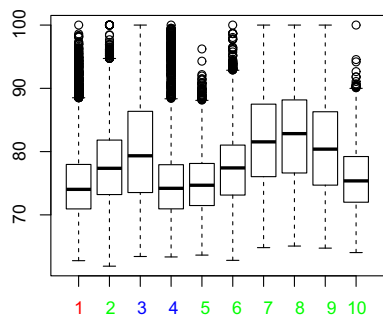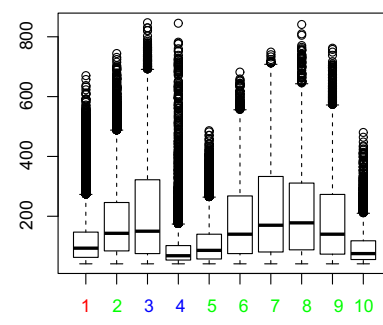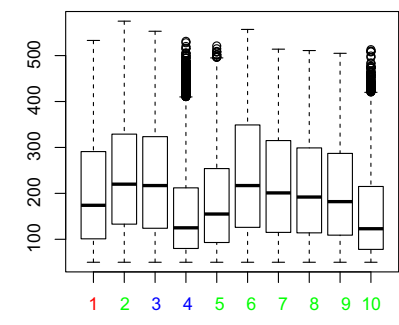

Fig. 56. (Continued)





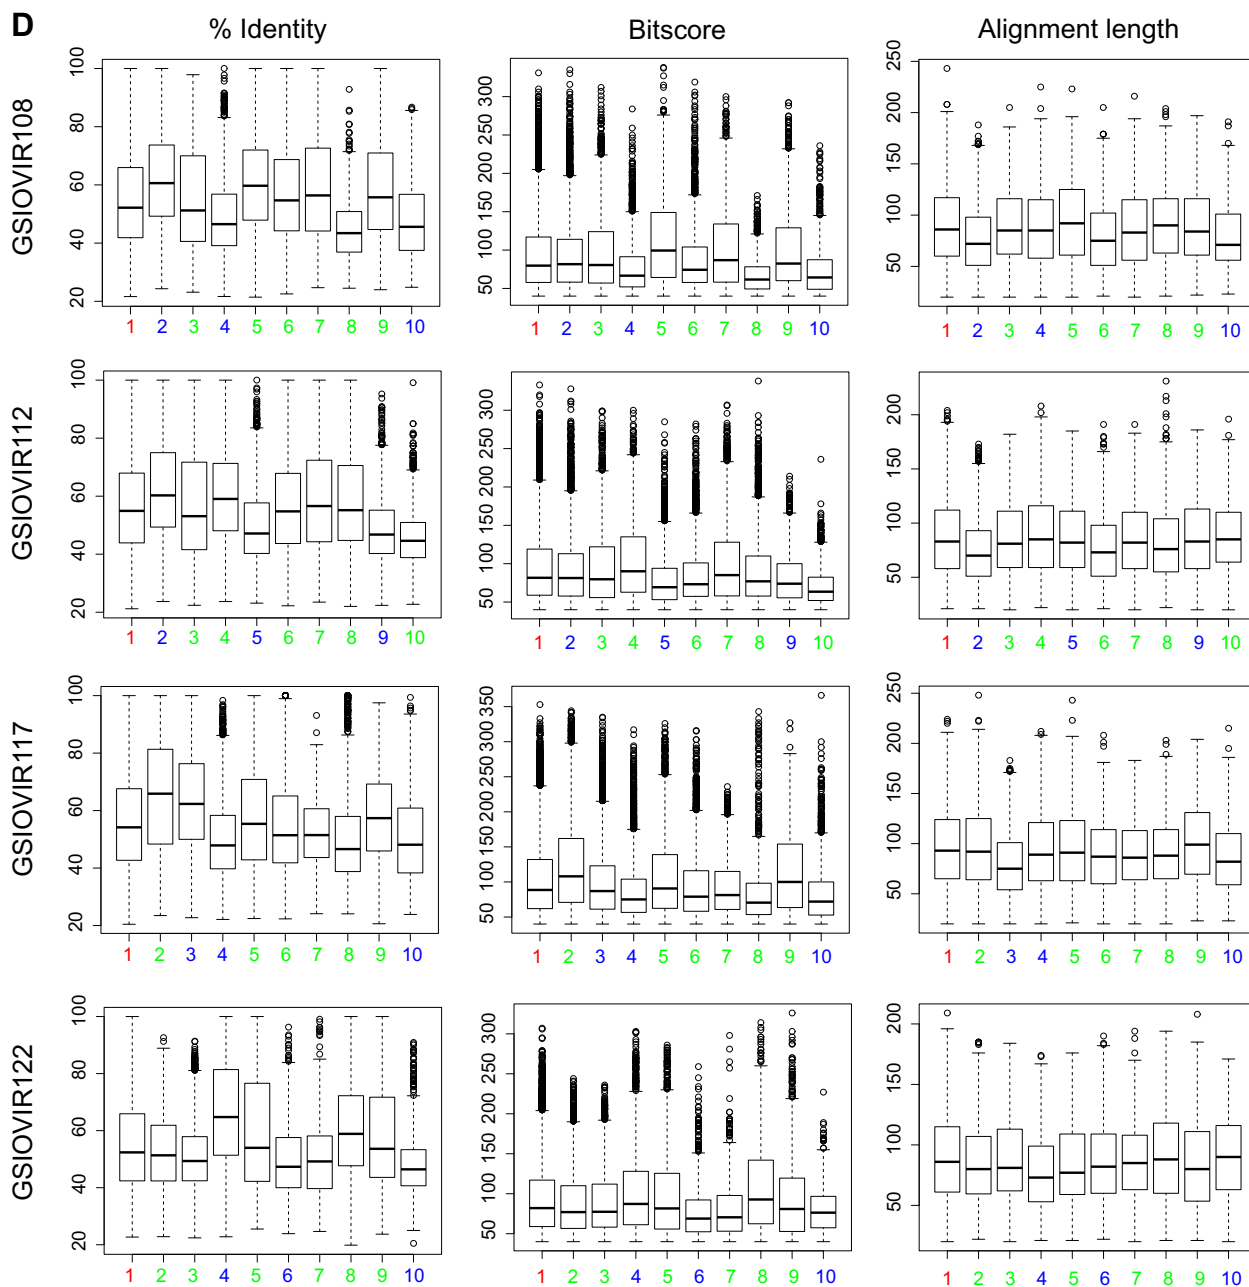

**Fig. S6.** Box plots showing the distribution of sequence similarities, bitscores, and alignment lengths of virome reads assigned to each highly ranked virus genome. Numbers on the x axes correspond to the rankings of each highly assigned virus as presented in Table S3 (refer to Table S3 for the names of the highly assigned viruses). Colors are assigned as in Table S3: HMO-2011 in red, pelagiphages in blue, cyanophages in green, and all other viruses in black. Data outside the 1.5x interquartile range, from the first or third quartile, are indicated with open circles. (A) Reads from three Pacific Ocean viromes assigned by BLASTN, (B) reads from four Indian Ocean viromes assigned by BLASTN, (C) reads from three Pacific Ocean viromes assigned by BLASTX, and (D) reads from four Indian Ocean viromes assigned by BLASTX. Sequence similarities were calculated at the nucleotide level (A and B) or at the amino acid level (C and D). Alignment lengths have been presented in nucleotides (A and B) or in amino acids (C and D).

Table S1. Annotation of ORFs predicted in the HMO-2011 genome

| ORF | Position    | Strand | Size, aa | Most significant hit in BLASTP against nr* (organism, GenBank accession no., no. of identical residues/aligned length/hit length, E-value)                                                             | Predicted function       | Domain, family, signal peptide (SP), and transmembrane helix (TM)                                     |
|-----|-------------|--------|----------|--------------------------------------------------------------------------------------------------------------------------------------------------------------------------------------------------------|--------------------------|-------------------------------------------------------------------------------------------------------|
| 1   | 433–1182    | +      | 249      | gp86 ( <i>Mycobacterium</i> phage Twister, AFF28335, 73/201/290, 7E–20)                                                                                                                                | —                        | —                                                                                                     |
| 2   | 1550–1951   | +      | 133      | gp89 ( <i>Mycobacterium</i> phage Alma, AER48797, 46/114/118, 3E–15)                                                                                                                                   | —                        | —                                                                                                     |
| 3   | 1974–2381   | +      | 135      | Apolipoprotein N-acyltransferase ( <i>Desulfobacter postgatei</i> , EIM62110, 18/75/519, 5.1)                                                                                                          | —                        | —                                                                                                     |
| 4   | 2779–2961   | +      | 60       | Hypothetical protein ( <i>Synechococcus</i> phage S-SSM7, ADO98252, 24/56/48, 3E–5)                                                                                                                    | —                        | —                                                                                                     |
| 5   | 3012–3353   | +      | 113      | COP1-interacting protein-like protein ( <i>Arabidopsis thaliana</i> , AEE81904, 22/48/317, 0.53)                                                                                                       | —                        | —                                                                                                     |
| 6   | 3495–4007   | +      | 170      | Hypothetical protein ( <i>Neisseria bacilliformis</i> , EGF12106, 29/74/220, 2E–10)                                                                                                                    | —                        | —                                                                                                     |
| 7   | 4070–4474   | +      | 134      | Mediator of DNA damage checkpoint protein 1-like ( <i>Apis florea</i> , XP_003690909, 26/99/279, 0.50)                                                                                                 | —                        | SP; TM                                                                                                |
| 8   | 4544–5380   | +      | 278      | Hypothetical protein ( <i>Vibrio fischeri</i> , ACH64802, 51/240/318, 3E–3)                                                                                                                            | —                        | PF06067 (Domain of unknown function DUF932)                                                           |
| 9   | 5377–6255   | +      | 292      | Putative phage integrase family protein ( <i>Azospirillum brasilense</i> , CCC96864, 84/291/353, 3E–19)                                                                                                | Integrase                | PF00589 (Phage integrase family)                                                                      |
| 10  | 6280–7059   | +      | 259      | Putative DNA primase ( <i>Xanthomonas</i> phage OP1, BAE72747, 57/180/282, 2E–07)                                                                                                                      | Primase                  | SSF56731 (DNA primase core)                                                                           |
| 11  | 7064–8287   | +      | 407      | Putative replicative DNA helicase (Blood disease bacterium R229, CCA83263, 112/433/425, 2E–20)                                                                                                         | Helicase                 | PF13481 (AAA domain); SSF52540 (P-loop containing nucleoside triphosphate hydrolases)                 |
| 12  | 8284–10326  | +      | 680      | DNA polymerase I ( <i>Desulfotomaculum nigrificans</i> , EGB21815, 117/357/882, 4E–35)                                                                                                                 | DNA polymerase           | PF01612 (3'-5' exonuclease); PF00476 (DNA polymerase family A)                                        |
| 13  | 10366–11268 | +      | 300      | Hypothetical protein ( <i>Mycobacterium tuberculosis</i> , ZP_02549341, 28/79/251, 0.82)                                                                                                               | —                        | —                                                                                                     |
| 14  | 11268–12122 | +      | 284      | DNA polymerase (Uncultured organism, AAL02212, 65/178/182, 6E–21)                                                                                                                                      | —                        | —                                                                                                     |
| 15  | 12112–12573 | +      | 153      | Endonuclease ( <i>Celeribacter</i> phage P12053L, AFM54632, 78/123/133, 3E–46)                                                                                                                         | Endonuclease             | PF05367 (Phage endonuclease I)                                                                        |
| 16  | 12570–12938 | +      | 122      | Hypothetical protein ( <i>Bacillus pseudofirmus</i> , ADC49254, 20/73/127, 1.5)                                                                                                                        | —                        | —                                                                                                     |
| 17  | 12935–13219 | +      | 94       | Protein 1.7 ( <i>Yersinia pestis</i> phage phiA1122, AAP20506, 40/72/76, 7E–19)                                                                                                                        | —                        | PF11753 (Protein of unknown function DUF3310)                                                         |
| 18  | 13373–15316 | +      | 647      | Hypothetical protein ( <i>Volvox carteri</i> , EFJ43138, 382/646/762, 0.0) Ribonucleoside-triphosphate reductase ( <i>Acanthocystis turfacea</i> Chlorella virus OR0704.3, AGE59602, 374/636/627, 0.0) | Ribonucleotide reductase | SSF51998 (PFL-like glycy radical enzymes) cd01676 (Class II ribonucleotide reductase, monomeric form) |
| 19  | 15679–16182 | +      | 167      | Golgin subfamily A member 2 ( <i>Acromyrmex echinator</i> , EGI68077, 20/68/919, 1.6)                                                                                                                  | —                        | —                                                                                                     |
| 20  | 16172–16411 | +      | 79       | Bifunctional aspartate kinase/diaminopimelate decarboxylase protein ( <i>Xylella fastidiosa</i> , AAO28288, 15/37/868, 6.3)                                                                            | —                        | —                                                                                                     |

Table S1. Cont.

| ORF | Position    | Strand | Size, aa | Most significant hit in BLASTP against nr* (organism, GenBank accession no., no. of identical residues/aligned length/hit length, E-value)                                                                                    | Predicted function              | Domain, family, signal peptide (SP), and transmembrane helix (TM) |
|-----|-------------|--------|----------|-------------------------------------------------------------------------------------------------------------------------------------------------------------------------------------------------------------------------------|---------------------------------|-------------------------------------------------------------------|
| 21  | 16386–16769 | +      | 127      | MazG nucleotide pyrophosphohydrolase domain protein ( <i>Alistipes</i> sp. HGB5, EFR57928, 67/110/108, 2E–37)                                                                                                                 | Nucleotide pyrophosphohydrolase | PF03819 (MazG nucleotide pyrophosphohydrolase domain)             |
| 22  | 20313–16927 | —      | 1128     | Branched-chain amino acid ABC transporter periplasmic protein ( <i>Rhodopseudomonas palustris</i> , ACF02740, 44/150/411, 0.35)                                                                                               | —                               | —                                                                 |
| 23  | 21821–20313 | —      | 502      | No hits                                                                                                                                                                                                                       | —                               | —                                                                 |
| 24  | 22315–21821 | —      | 164      | Vacuolar protein sorting-associated protein 18 ( <i>Culex quinquefasciatus</i> , EDS44865, 30/120/572, 2.8)                                                                                                                   | —                               | —                                                                 |
| 25  | 24624–22504 | —      | 706      | Hypothetical protein (Uncultured organism MedDCM-OCT-504-C16, ADD96023, 36/71/354, 1E–15)                                                                                                                                     | —                               | —                                                                 |
| 26  | 24832–24626 | —      | 68       | Phage replication protein ( <i>Klebsiella oxytoca</i> , AFN33316, 16/52/710, 0.72)                                                                                                                                            | —                               | TM                                                                |
| 27  | 25008–24832 | —      | 58       | Diguanylate cyclase ( <i>Desulfuromonas acetoxidans</i> , EAT14554, 14/49/353, 7.9)                                                                                                                                           | —                               | —                                                                 |
| 28  | 26104–25010 | —      | 364      | Hypothetical protein ( <i>Acidovorax citrulli</i> , ABM32947, 101/294/669, 4E–33)<br>Hypothetical protein Xp10p26 ( <i>Xanthomonas</i> phage Xp10, AAP58693, 85/334/498, 7E–4)                                                | Tail structure                  | —                                                                 |
| 29  | 26502–26101 | —      | 133      | Hypothetical protein (Uncultured phage MedDCM-OCT-509-C299, ADD94746, 42/83/132, 4E–17) Tail fiber (Cyanophage Syn5, ABP87953, multiple matches: 20/46/1351, 20/72/1351, 17/44/1351, 16/46/1351, 20/75/1351)                  | Tail structure                  | —                                                                 |
| 30  | 26747–26502 | —      | 81       | Hypothetical protein ( <i>Pelagibaca bermudensis</i> , EAU45063, 29/78/161, 8E–7)<br>Tail fiber protein ( <i>Synechococcus</i> phage S-CB54, AEX56016, 19/52/146, 1E–3)                                                       | Tail structure                  | —                                                                 |
| 31  | 27276–26752 | —      | 174      | Hypothetical protein (Organic Lake phycodnavirus 2, ADX06235, 34/101/1038, 4E–9)                                                                                                                                              | Structure                       | PF00386 (C1q domain)                                              |
| 32  | 27662–27276 | —      | 128      | Hypothetical protein (Uncultured phage MedDCM-OCT-509-C399, ADD94772, 47/128/126, 4E–4) Tail fiber (Cyanophage Syn5, ABP87953, multiple matches from PSI-BLAST: 16/103/1351, 17/103/1351, 19/77/1351, 21/74/1351, 19/94/1351) | Tail structure                  | —                                                                 |
| 33  | 28108–27647 | —      | 153      | Hypothetical protein (Uncultured marine bacterium MedDCM-OCT-509-C145, ADD94874, 39/86/545, 2E–14) Tail fiber-like protein ( <i>Synechococcus</i> phage S-SM2, ADO97376, 43/111/919, 5E–8)                                    | Tail structure                  | —                                                                 |
| 34  | 28488–28108 | —      | 126      | Hypothetical protein (Uncultured phage MedDCM-OCT-509-C399, ADD94772, 31/90/126, 1.8E–2) Similar to ORF32 (amino acid identity: 31%) <sup>†</sup>                                                                             | Tail structure                  | —                                                                 |
| 35  | 28865–28500 | —      | 121      | Predicted protein (Cyanophage NATL2A-133, ADP00151, 50/80/85, 4E–21) Tail fiber assembly protein ( <i>Pantoea stewartii</i> DC283, EHU00846, 21/56/197, 1.7)                                                                  | Tail structure                  | —                                                                 |
| 36  | 29352–28879 | —      | 157      | MFS general substrate transporter ( <i>Fomitiporia mediterranea</i> , EJD02383, 25/67/791, 0.45)                                                                                                                              | —                               | —                                                                 |



Table S1. Cont.

| ORF | Position    | Strand | Size, aa | Most significant hit in BLASTP against nr* (organism, GenBank accession no., no. of identical residues/aligned length/hit length, E-value)                                        | Predicted function       | Domain, family, signal peptide (SP), and transmembrane helix (TM) |
|-----|-------------|--------|----------|-----------------------------------------------------------------------------------------------------------------------------------------------------------------------------------|--------------------------|-------------------------------------------------------------------|
| 37  | 29753–29352 | —      | 133      | Hypothetical protein (Uncultured phage MedDCM-OCT-509-C399, ADD94772, 25/56/126, 8E–06) Tail fiber (Cyanophage Syn5, ABP87953, two matches: 34/100/1351, 16/43/1351)              | Tail structure           | —                                                                 |
| 38  | 30055–29735 | —      | 106      | Hypothetical protein (Uncultured phage MedDCM-OCT-504-C26, ADD95062, 38/93/117, 2E–12) Tail fiber protein ( <i>Synechococcus</i> phage S-CBS4, AEX56016, 23/69/146, 1.3)          | Tail structure           | —                                                                 |
| 39  | 30545–30060 | —      | 161      | Hypothetical protein ( <i>Prochlorococcus</i> phage P-SSP7, AAX44218, 59/163/191, 5E–9)                                                                                           | Structure                | —                                                                 |
| 40  | 30916–30542 | —      | 124      | Hypothetical protein (Uncultured phage MedDCM-OCT-509-C299, ADD94745, 57/132/132, 6E–19) Tail fiber (Cyanophage Syn5, ABP87953, Three matches 20/56/1351, 20/53/1351, 15/46/1351) | Tail structure           | —                                                                 |
| 41  | 31362–30913 | —      | 149      | Hypothetical protein ( <i>Synechococcus elongatus</i> , ABB56777, 24/47/387, 3E–3) Tail fiber ( <i>Pelagibacter</i> phage HTVC019P, AGE60615, 24/57/491, 3.7)                     | Tail structure           | —                                                                 |
| 42  | 31699–31373 | —      | 108      | Hypothetical protein (Uncultured organism MedDCM-OCT-508-C1350, ADD96228, 48/81/85, 3E–26) Virion structural protein (Cyanophage S-TIM5, AEZ65682, 43/127/126, 6E–7)              | Structure                | —                                                                 |
| 43  | 33539–31758 | —      | 593      | Hypothetical protein ( <i>Sinorhizobium fredii</i> , ACP24927, 71/124/506, 3E–27) S protein (Enterobacteria phage P1, AAQ14006, 69/355/987, 2E–17 from PSI-BLAST)                 | Tail structure           | —                                                                 |
| 44  | 35051–33543 | —      | 502      | Hypothetical protein ( <i>Acidovorax</i> sp. CF316, EJE52265, 99/387/682, 9E–11) Structural protein ( <i>Brucella</i> phage Pr, AEY69748, 26/163/645, 6E–6 from PSI-BLAST)        | Structure                | —                                                                 |
| 45  | 35776–35060 | —      | 238      | Thioredoxin-disulfide reductase ( <i>Desulfotomaculum kuznetsovii</i> , AEG16215, 37/121/302, 0.42)                                                                               | —                        | —                                                                 |
| 46  | 36318–35833 | —      | 161      | Conserved hypothetical protein ( <i>Vibrio parahaemolyticus</i> , EED25475, 17/62/174, 5.2)                                                                                       | —                        | —                                                                 |
| 47  | 37392–36331 | —      | 353      | Hypothetical protein ( <i>Bifidobacterium longum</i> subsp. <i>infantis</i> , BAJ71205, 107/336/285, 6E–38)                                                                       | Capsid protein           | PF11651 (P22 coat protein - gene protein 5)                       |
| 48  | 38502–37633 | —      | 289      | Hypothetical protein ( <i>Haemophilus influenzae</i> , ZP_01797928, 49/185/284, 2E–3)                                                                                             | —                        | —                                                                 |
| 49  | 41060–38772 | —      | 762      | Hypothetical protein ( <i>Actinobacillus minor</i> , EEV25019, 51/122/143, 1E–22)                                                                                                 | —                        | —                                                                 |
| 50  | 41223–41047 | —      | 58       | Hypothetical protein ( <i>Taylorella asinigenitalis</i> , AEP36223, 17/50/72, 0.12)                                                                                               | —                        | —                                                                 |
| 51  | 43324–41189 | —      | 711      | Hypothetical protein ( <i>Desulfovibrio</i> , sp. 6_1_46AFAA, EGW50096, 185/652/717, 8E–61) 94 kDa protein (gp59) ( <i>Escherichia</i> phage N4, ABK54420, 53/203/763, 4E–5)      | Portal protein           | —                                                                 |
| 52  | 44894–43335 | —      | 519      | Protein of unknown function DUF264 ( <i>Thermosinus carboxydivorans</i> , EAX47548, 177/432/845, 4E–88)                                                                           | Terminase, large subunit | PF03237 (Terminase-like family)                                   |
| 53  | 45174–44773 | —      | 133      | Hypothetical protein ( <i>Ruminococcus obeum</i> , EDM86090, 21/79/645, 0.54)                                                                                                     | —                        | —                                                                 |
| 54  | 45128–45220 | +      | 30       | Preprotein translocase, YajC subunit ( <i>Rothia dentocariosa</i> , EFJ77340, 11/20/112, 0.40)                                                                                    | —                        | SP; TM                                                            |

Table S1. Cont.

| ORF | Position    | Strand | Size, aa | Most significant hit in BLASTP against nr* (organism, GenBank accession no., no. of identical residues/aligned length/hit length, E-value)                                             | Predicted function                | Domain, family, signal peptide (SP), and transmembrane helix (TM) |
|-----|-------------|--------|----------|----------------------------------------------------------------------------------------------------------------------------------------------------------------------------------------|-----------------------------------|-------------------------------------------------------------------|
| 55  | 45541–45167 | —      | 124      | Hypothetical protein ( <i>Staphylococcus haemolyticus</i> , BAE05668, 34/114/126, 8E–3)                                                                                                | Terminase, small subunit          | PF03592 (Terminase small subunit) (predicted by HHpred)           |
| 56  | 46026–45541 | —      | 161      | Family 24 glycoside hydrolase ( <i>Arcobacter nitrofigilis</i> , ADG93351, 61/150/138, 3E–27)                                                                                          | Lysozyme                          | PF00959 (Phage lysozyme)                                          |
| 57  | 46136–46023 | —      | 37       | Hypothetical protein (Uncultured organism MedDCM-OCT-509-C94, ADD96476, 20/36/68, 3E–6)                                                                                                |                                   | TM                                                                |
| 58  | 46664–46281 | —      | 127      | Hypothetical protein ( <i>Pseudomonas</i> phage PA11, YP_001294624, 53/123/119, 2E–28)                                                                                                 |                                   | 2 TM                                                              |
| 59  | 46903–46664 | —      | 79       | Hypothetical protein ( <i>Pseudomonas fulva</i> , AEF20734, 37/76/172, 6E–16)                                                                                                          | —                                 | —                                                                 |
| 60  | 47355–46900 | —      | 151      | Hypothetical protein ( <i>Anolis carolinensis</i> , XP_003214352, 35/116/1347, 0.28)                                                                                                   |                                   | TM                                                                |
| 61  | 48439–47357 | —      | 360      | Methanesulfonate monooxygenase, hydroxylase alpha (large) subunit ( <i>Candidatus Puniceispirillum marinum</i> 1322, ADE40352, 269/355/364, 0.0)                                       | Methanesulfonate monooxygenase(?) | PF00848 (Ring hydroxylating alpha subunit)                        |
| 62  | 48669–48439 | —      | 76       | Predicted protein ( <i>Hordeum vulgare</i> subsp. <i>vulgare</i> , BAJ90467, 25/74/882, 0.15)                                                                                          | —                                 | SP                                                                |
| 63  | 49025–48666 | —      | 119      | Hypothetical protein ( <i>Modestobacter marinus</i> , CCH87769, 31/55/194, 2E–14)                                                                                                      | —                                 | —                                                                 |
| 64  | 49369–49031 | —      | 112      | Hypothetical protein ( <i>Geobacillus</i> sp. Y412MC61, YP_003251799, 40/110/109, 9E–4)                                                                                                | —                                 | —                                                                 |
| 65  | 50628–49369 | —      | 419      | Hypothetical protein ( <i>Synechococcus</i> phage S-RIM8 A.HR1, AFB17591, 275/413/436, 0.0) Virion structural protein (Cyanophage S-TIM5, AEZ65693, 48/299/1472, 2E–18 from PSI-BLAST) | Structure                         | —                                                                 |
| 66  | 51297–50770 | —      | 175      | Hypothetical protein ( <i>Aphanizomenon</i> sp. NH-5, ACG63808, 45/171/191, 8E–10)                                                                                                     | —                                 | —                                                                 |
| 67  | 51632–51297 | —      | 111      | Hypothetical protein ( <i>Clostridium saccharolyticum</i> , ADL04451, 20/52/189, 0.17)                                                                                                 | —                                 | —                                                                 |
| 68  | 52641–51604 | —      | 345      | No hits                                                                                                                                                                                | —                                 | —                                                                 |
| 69  | 52759–52466 | —      | 97       | Hypothetical protein ( <i>Synechococcus</i> phage S-CBS2, ADF42402, 47/90/96, 3E–20)                                                                                                   | —                                 | —                                                                 |
| 70  | 52959–52759 | —      | 66       | Hypothetical protein (Uncultured alpha proteobacterium, ADI19141, 15/51/65, 4.0)                                                                                                       | —                                 | SP                                                                |
| 71  | 53175–52960 | —      | 71       | Hypothetical protein ( <i>Vibrio shilonii</i> , ZP_01866522, 22/52/289, 1.1)                                                                                                           | —                                 | —                                                                 |
| 72  | 53665–53928 | +      | 87       | Metalloendopeptidase ( <i>Zobellia galactanivorans</i> , CAZ96295, 13/27/1261, 6.9)                                                                                                    | —                                 | —                                                                 |
| 73  | 53907–53776 | —      | 43       | Hypothetical protein ( <i>Trypanosoma brucei</i> , EAN79303, 14/36/1056, 4.1)                                                                                                          | —                                 | —                                                                 |
| 74  | 54168–54785 | +      | 205      | 3-deoxy-D-manno-octulosonic-acid transferase ( <i>Ruegeria</i> sp. R11, EEB72743, 27/76/398, 0.73)                                                                                     | —                                 | —                                                                 |

\*Additional BLASTP or PSI-BLAST results were presented for some ORFs to show the basis of functional annotations.

†Paralogous relationships were used for functional assignments of some tail structure genes if necessary (see also Fig. S3).

**Table S2. Number of metagenome sequences putatively encoding a DNA polymerase with a partial DnaJ central domain**

| Sample name or ID in CAMERA           | No. of sequences | Geographic position and description      | Sample name or ID in CAMERA | No. of sequences | Geographic position and description                               |
|---------------------------------------|------------------|------------------------------------------|-----------------------------|------------------|-------------------------------------------------------------------|
| ANTARCTICAAQUATIC_SMP_L_SITE232_0.1UM | 2                | Ace Lake, Antarctica                     | CAM_SMP_L_SRA022117         | 1                | Ross Sea, McMurdo Sound, Antarctica                               |
| ANTARCTICAAQUATIC_SMP_L_SITE6         | 1                | Ace Lake, Antarctica                     | CAM_SMP_L_SRA022118         | 1                | Ross Sea, McMurdo Sound, Antarctica                               |
| CAM_S_1336                            | 72               | North American West Coast                | CAM_SMP_L_SRA022119         | 1                | Ross Sea, McMurdo Sound, Antarctica                               |
| CAM_S_596                             | 4                | Atlantic Ocean                           | CAM_SMP_L_SRA022120         | 9                | Ross Sea, McMurdo Sound, Antarctica                               |
| CAM_SMP_L_000709                      | 1                | Coral, Wreck Reef                        | CAM_SMP_L_SRA022121         | 22               | Ross Sea, McMurdo Sound, Antarctica                               |
| CAM_SMP_L_000719                      | 3                | Hydrothermal vent, Pacific               | CAM_SMP_L_SRA022122         | 6                | Ross Sea, McMurdo Sound, Antarctica                               |
| CAM_SMP_L_000720                      | 4                | Hydrothermal vent, Pacific               | CAM_SMP_L_SRA022123         | 14               | Ross Sea, McMurdo Sound, Antarctica                               |
| CAM_SMP_L_000721                      | 7                | Hydrothermal vent, Pacific               | CAM_SMP_L_SRA022124         | 21               | Ross Sea, McMurdo Sound, Antarctica                               |
| CAM_SMP_L_000722                      | 12               | Pacific Ocean                            | CAM_SMP_L_SRA022142         | 1                | Southern Ocean                                                    |
| CAM_SMP_L_000723                      | 9                | Pacific Ocean                            | CAM_SMP_L_SRA022147         | 3                | East Antarctica Plain                                             |
| CAM_SMP_L_000724                      | 6                | Pacific Ocean                            | CAM_SMP_L_SRA022150         | 9                | CEAMARC-61, 34 nm from Antarctica coast                           |
| CAM_SMP_L_000725                      | 17               | Pacific Ocean                            | CAM_SMP_L_SRA022153         | 5                | CEAMARC-8, bottom sample, 16 nm from Antarctica                   |
| CAM_SMP_L_000726                      | 2                | Pacific Ocean                            | CAM_SMP_L_SRA022155         | 2                | CEAMARC-43, 6.3 nm from Antarctica                                |
| CAM_SMP_L_000727                      | 5                | Pacific Ocean                            | CAM_SMP_L_SRA022156         | 1                | CEAMARC-43. 6.3 nm from Antarctica                                |
| CAM_SMP_L_000816                      | 11               | Pacific Ocean                            | CAM_SMP_L_SRA022158         | 2                | CEAMARC-49A, Deep sample 1 nm from Mertz Glacier                  |
| CAM_SMP_L_000825                      | 4                | Equatorial Atlantic                      | CAM_SMP_L_SRA022159         | 3                | CEAMARC-49A, Deep sample 1 nm from Mertz Glacier                  |
| CAM_SMP_L_000833                      | 3                | Suboxic marine basin, Pacific            | CAM_SMP_L_SRA022161         | 3                | CEAMARC-59- Deep sample                                           |
| CAM_SMP_L_000834                      | 2                | Pacific: Gulf of California              | CAM_SMP_L_SRA022166         | 2                | Polynya                                                           |
| CAM_SMP_L_000837                      | 1                | Pacific Ocean                            | CAM_SMP_L_SRA022170         | 3                | CEAMARC-70, 16 miles from Antarctica coast                        |
| CAM_SMP_L_000841                      | 1                | Eel River                                | CAM_SMP_L_SRA022172         | 1                | Iceberg-4, 250 meters away from 35 km long and 18 km wide iceberg |
| CAM_SMP_L_000844                      | 1                | Estuary, Atlantic                        | CAM_SMP_L_SRA022173         | 1                | Transect from Antarctic to Hobart                                 |
| CAM_SMP_L_000957                      | 7                | Pacific Ocean                            | CAM_SMP_L_SRA022174         | 1                | Open Ocean Transect                                               |
| CAM_SMP_L_000960                      | 1                | Atlantic Ocean                           | CAM_SMP_L_SRA022175         | 1                | Open Ocean Transect                                               |
| CAM_SMP_L_000961                      | 2                | Pacific Ocean: Southern California Bight | CAM_SMP_L_SRA022178         | 1                | Open Ocean Transect                                               |
| CAM_SMP_L_000966                      | 10               | Chesapeake bay station 858               | CAM_SMP_L_SRA022180         | 16               | Ross Sea, McMurdo Sound, Antarctica                               |
| CAM_SMP_L_000972                      | 1                | North Sea, Atlantic                      | CAM_SMP_L_SRA022181         | 14               | Ross Sea, McMurdo Sound, Antarctica                               |
| CAM_SMP_L_000974                      | 1                | Atlantic                                 | CAM_SMP_L_SRA022192         | 2                | Southern Ocean                                                    |
| CAM_SMP_L_000990                      | 13               | Pacific Ocean: Southern California Bight | CAM_SMP_L_SRA022193         | 4                | Southern Ocean                                                    |
| CAM_SMP_L_000994                      | 7                | Chesapeake bay station 858               | CAM_SMP_L_SRA022199         | 1                | Southern Ocean                                                    |
| CAM_SMP_L_001000                      | 4                | Chesapeake bay station 858               | CAM_SMP_L_SRA022200         | 1                | Southern Ocean                                                    |
| CAM_SMP_L_001003                      | 3                | Pacific Ocean                            | CAM_SMP_L_SRA022201         | 6                | Southern Ocean                                                    |
| CAM_SMP_L_001014                      | 3                | Pacific Ocean: Southern California Bight | CAM_SMP_L_SRA022202         | 1                | Southern Ocean                                                    |
| CAM_SMP_L_001589                      | 1                | Biosphere2 ocean                         | CAM_SMP_L_SRA022206         | 1                | Open Ocean Transect                                               |
| CAM_SMP_L_001739                      | 8                | Oregon Coast                             | GS000c                      | 1                | Sargasso Sea                                                      |
| CAM_SMP_L_001740                      | 2                | Oregon Coast                             | GS000d                      | 1                | Sargasso Sea                                                      |
| CAM_SMP_L_001742                      | 1                | Oregon Coast                             | GS002                       | 16               | North American East Coast                                         |

Table S2. Cont.

| Sample name or ID in CAMERA | No. of sequences | Geographic position and description                               | Sample name or ID in CAMERA | No. of sequences | Geographic position and description    |
|-----------------------------|------------------|-------------------------------------------------------------------|-----------------------------|------------------|----------------------------------------|
| CAM_SMPL_001743             | 5                | Oregon Coast                                                      | GS004                       | 1                | North American East Coast              |
| CAM_SMPL_001745             | 2                | Oregon Coast                                                      | GS005                       | 6                | North American East Coast              |
| CAM_SMPL_001746             | 6                | Oregon Coast                                                      | GS006                       | 2                | North American East Coast              |
| CAM_SMPL_001748             | 1                | Oregon Coast                                                      | GS007                       | 1                | North American East Coast              |
| CAM_SMPL_001749             | 6                | Oregon Coast                                                      | GS008                       | 5                | North American East Coast              |
| CAM_SMPL_001750             | 4                | Oregon Coast                                                      | GS009                       | 3                | North American East Coast              |
| CAM_SMPL_001751             | 5                | Oregon Coast                                                      | GS010                       | 5                | North American East Coast              |
| CAM_SMPL_001752             | 4                | Oregon Coast                                                      | GS013                       | 2                | North American East Coast              |
| CAM_SMPL_001768             | 1                | Oregon Coast                                                      | GS017                       | 4                | Caribbean Sea                          |
| CAM_SMPL_GS108              | 1                | Coccos Keeling, Inside Lagoon                                     | GS018                       | 1                | Caribbean Sea                          |
| CAM_SMPL_GS112              | 3                | Indian Ocean                                                      | GS019                       | 3                | Caribbean Sea                          |
| CAM_SMPL_SRA022044          | 5                | Botany Bay, Australia                                             | GS023                       | 3                | Eastern Tropical Pacific               |
| CAM_SMPL_SRA022077          | 1                | Southern Ocean                                                    | GS025                       | 7                | Eastern Tropical Pacific               |
| CAM_SMPL_SRA022079          | 1                | New Comb Bay, Antarctica                                          | GS026                       | 2                | Galapagos Islands                      |
| CAM_SMPL_SRA022081          | 1                | Antarctica Open water                                             | GS027                       | 9                | Galapagos Islands                      |
| CAM_SMPL_SRA022083          | 6                | CEAMARC-27 Antarctica Shelf-64 nm off continent.                  | GS028                       | 7                | Galapagos Islands                      |
| CAM_SMPL_SRA022085          | 1                | CEAMARC-61, 34 nm from Antarctica coast                           | GS029                       | 10               | Galapagos Islands                      |
| CAM_SMPL_SRA022087          | 1                | CEAMARC-8, bottom sample, 16 nm from Antarctica                   | GS030                       | 4                | Galapagos Islands                      |
| CAM_SMPL_SRA022088          | 1                | CEAMARC-8, bottom sample, 16 nm from Antarctica                   | GS031                       | 4                | Galapagos Islands                      |
| CAM_SMPL_SRA022089          | 1                | CEAMARC-37, 18 nm from Antarctica                                 | GS032                       | 5                | Galapagos Islands                      |
| CAM_SMPL_SRA022092          | 1                | CEAMARC-47, 2nm from Antarctica and 9.5 nm from Mertz Glacier     | GS033                       | 17               | Galapagos Islands                      |
| CAM_SMPL_SRA022093          | 6                | CEAMARC-49A, Deep sample 1 nm from Mertz Glacier                  | GS034                       | 1                | Galapagos Islands                      |
| CAM_SMPL_SRA022094          | 1                | CEAMARC-59                                                        | GS035                       | 2                | Galapagos Islands                      |
| CAM_SMPL_SRA022095          | 2                | CEAMARC-59                                                        | GS036                       | 2                | Galapagos Islands                      |
| CAM_SMPL_SRA022096          | 2                | CEAMARC-59- Deep sample                                           | GS047                       | 2                | Tropical South Pacific                 |
| CAM_SMPL_SRA022097          | 1                | Polyna-W-Compass-B Time series                                    | GS048a                      | 3                | Polynesia Archipelagos                 |
| CAM_SMPL_SRA022099          | 3                | CASO-15, Off continental shelf                                    | GS110a                      | 1                | Indian Ocean                           |
| CAM_SMPL_SRA022101          | 1                | CEAMARC-12, 10 nm from shore of Dumont d'urville, french station  | GS115                       | 1                | Indian Ocean                           |
| CAM_SMPL_SRA022102          | 1                | CEAMARC-70, 16 miles from Antarctica coast                        | GS116                       | 1                | Indian Ocean                           |
| CAM_SMPL_SRA022104          | 3                | Iceberg-4, 250 meters away from 35 km long and 18 km wide iceberg | GS119                       | 1                | Indian Ocean                           |
| CAM_SMPL_SRA022107          | 1                | Open Ocean Transect                                               | HF_SMPL_BATS216_20M_SG      | 1                | Bermuda time Series BATS Station 20m   |
| CAM_SMPL_SRA022111          | 1                | Open Ocean Transect                                               | HF_SMPL_HOT179_25M_SG       | 1                | Hawaii Ocean Time-series Station ALOHA |
| CAM_SMPL_SRA022112          | 9                | Open Ocean Transect                                               | HF_SMPL_HOT186_75M_GDNA     | 1                | Hawaii Ocean Time-series Station ALOHA |

**Table S2. Cont.**

| Sample name or ID in CAMERA | No. of sequences | Geographic position and description | Sample name or ID in CAMERA | No. of sequences | Geographic position and description |
|-----------------------------|------------------|-------------------------------------|-----------------------------|------------------|-------------------------------------|
| CAM_SMPL_SRA022115          | 6                | Ross Sea, McMurdo Sound, Antarctica | MOVE0902                    | 2                | Chesapeake Bay                      |
| CAM_SMPL_SRA022116          | 3                | Ross Sea, McMurdo Sound, Antarctica | MOVE858                     | 2                | North American East Coast           |
